# Supplementary material for: Investigating a New Psychological Variable in Second Language Acquisition: Comparing Social Identity Across Canadian French Education Programs
Source: Frontiers journal article supplement (doi:10.3389/feduc.2022.874287), 2022-05-12
Supplement: Data_Sheet_1.pdf [file Data_Sheet_1.pdf]

### **Ingroup Identification Questionnaire Items**

#### **Group-level self-investment**

1. I feel a bond with students in my French program.
2. I feel solidarity with students in my French program.
3. I feel committed to my French program.
4. I am glad to be in my French program.
5. I think that students in my French program have a lot to be proud of.
6. It is enjoyable to be a student in my French program.
7. Being a student in my French program feels good.
8. I often think about the fact that I am a student in my French program.
9. The fact that I am a student in my French program is an important part of my identity.
10. Being a student in my French program is an important part of how I see myself.

#### **Group-level self-definition**

11. I have a lot in common with many students in my French program.
12. I am similar to the average student in my French program.
13. Students in my French program have a lot in common with each other.
14. Students in my French program are very similar to each other.
